# Supplementary material
Source: publisher figshare collection journal article supplement (https://tandf.figshare.com/articles/dataset/_/5606719)
Supplement: Supplementary file 4 [file 2]

### Supplementary Figure Captions

Supplementary Figure 1. Event-related potential waveforms for 29 scalp electrodes time-locked to the coordinator (*and*) or the placeholder (###) for natural list and natural coordination conditions in Experiment 1.

Supplementary Figure 2. Event-related potential waveforms for 29 scalp electrodes time-locked to the coordinator (*and*) or the placeholder (###) for natural list and natural coordination conditions in Experiment 1.

Supplementary Figure 3. Event-related potential waveforms for 29 scalp electrodes time-locked to the first word of the trial (e.g. *sunlit*) for natural list and natural coordination conditions in Experiment 1.

Supplementary Figure 4. Event-related potential waveforms for 29 scalp electrodes time-locked to the coordinator (*and*) or the placeholder (###) for natural list and natural coordination conditions in Experiment 1.

Supplementary Figure 5. Event-related potential waveforms for 29 scalp electrodes time-locked to the coordinator (*and*) or the placeholder (###) for natural list and natural coordination conditions in Experiment 1.
